# Supplementary material for: A facile method to prepare high molecular weight bio-renewable poly(γ-butyrolactone) using a strong base/urea binary synergistic catalytic system
Source: Royal Society of Chemistry journal article supplement (doi:10.1039/c8py01812j), 2019-01-01
Supplement: c8py01812j1.pdf [file c8py01812j1.pdf]

Supporting Information for Manuscript Entitled with  
**A facile method to prepare high molecular weight bio-renewable poly( $\gamma$ -butyrolactone) using a strong base/urea binary synergistic catalytic system**

*Yong Shen,<sup>a</sup> Zhichao Zhao,<sup>a</sup> Yunxin Li,<sup>b</sup> Shaofeng Liu,<sup>b</sup> Fusheng Liu<sup>\*,a</sup> and Zhibo Li<sup>\*,b</sup>*

<sup>a</sup> State Key Laboratory Base of Eco-Chemical Engineering; College of Chemical Engineering, Qingdao University of Science and Technology, Qingdao 266042, China.

<sup>b</sup> Key Laboratory of Biobased Polymer Materials, Shandong Provincial Education Department; College of Polymer Science and Engineering, Qingdao University of Science and Technology, Qingdao 266042, China.

Corresponding Author: E-mail: [liufusheng63@sina.com](mailto:liufusheng63@sina.com)

E-mail: [zbli@qust.edu.cn](mailto:zbli@qust.edu.cn)

## **Experimental Section**

### **Materials.**

Tetrahydrofuran (THF) was purified by purging with dry nitrogen, followed by passing through columns of activated alumina. Potassium methoxide (KOMe, 90+ %) was obtained from Alfa Aesar Co. Potassium *tert*-butoxide (tBuOK, 98 %) was purchased from Energy Chemical Co.  $\gamma$ -Butyrolactone ( $\gamma$ BL) obtained from Aladdin Reagent Co. was stirred with CaH<sub>2</sub> for 24 hours, then distilled under reduced pressure and stored over activated 4 Å molecular sieves in a glove box. THF-d<sub>8</sub> was stirred with Na/K alloy for 48 hours and then distilled under vacuum. The cyclic trimeric phosphazene base (CTPB) was synthesized according to the reported procedure.<sup>1</sup> 1-Phenyl-3-(4-(trifluoromethyl) phenyl) urea (U1),<sup>2</sup> 1-(4-chlorophenyl)-3-phenylurea

(U2),<sup>3</sup> 1-(4-chlorophenyl)-3-(4-methoxyphenyl) urea (U3),<sup>4</sup> 1, 3-diisopropylurea (U4),<sup>5</sup> 1-(4-chlorophenyl)-3-cyclohexylurea (U5),<sup>6</sup> 1-cyclohexyl-3-(4-methoxyphenyl) urea (U6)<sup>7</sup> and 1-cyclohexyl-3-phenylurea (U7)<sup>8</sup> were prepared based on the reported procedures from commercially available isocyanates and amines. 1, 3-Diphenylthiourea (TU1) was prepared by reacting phenyl isothiocyanate with aniline in a similar way to U2. Ureas and TU1 were dried under vacuum at 50 °C for at least 8 hours and then stored in a glove box. All commercially obtained reagents were used as received without further purification unless otherwise noted.

### **Instruments.**

Nuclear magnetic resonance (NMR) spectra were recorded on a Bruker AVNEO400ASCEND FT-NMR spectrometer at 400 MHz for <sup>1</sup>H NMR and 100 MHz for <sup>13</sup>C NMR. Chemical shifts were reported in  $\delta$  (ppm) relative to the residual deuterated solvent peak. Matrix-assisted laser desorption/ionization time-of-flight mass spectroscopy (MALDI-TOF MS) analyses were conducted on a Bruker Microflex LRF MS spectrometer equipped with a 337 nm nitrogen laser operating in a positive ion, linear mode. The sample solutions (10 mg/mL in THF), *trans*-2-[3-(4-*tert*-butylphenyl)-2-methyl-2-propenylidene] malononitrile (DCTB) solution (50 mg/mL in THF) and sodium trifluoroacetate solution (5 mg/mL) were mixed in a volume ratio of 4:2:1, 1  $\mu$ L of which was then deposited on the target plate and dried before measurement. Size exclusion chromatography (SEC) experiments were performed on a Agilent HPLC system equipped with a model 1260 Hip degasser, a model 1260 Iso pump and a model 1260 differential refractometer detector with using THF as mobile phase at a flow rate of 1.0 mL/min at 40 °C. One PLgel 5  $\mu$ m guard column and three Mz-Gel SD<sub>plus</sub> columns (10<sup>3</sup> Å, 10<sup>4</sup> Å, and 10<sup>5</sup> Å, linear range of MW = 1000 – 2\*10<sup>6</sup> Da) were connected in series. SEC experiments were also conducted on a SEC system equipped with Shimadzu LC-20AD pump and a Wyatt Optilab differential refractometer detector with using DMF as mobile phase at a flow rate of 1.0 mL/min at 40 °C. One Mz-Gel SD<sub>plus</sub> guard column and three PLgel 5  $\mu$ m columns (500 Å, 10<sup>3</sup> Å, 10<sup>4</sup> Å, linear range of MW = 500 – 1.7\*10<sup>6</sup> Da) were connected in series. The molecular weight and dispersity were calculated using 10

polystyrene standards with narrow molecular weight distribution as references. The sample concentration used for SEC analyses was 5-10 mg/mL. Differential scanning calorimetry (DSC) measurements were performed on a TA instrument DSC 25. Temperature was calibrated with an indium standard. Measurements were performed under N<sub>2</sub> atmosphere with a flow rate of 50 mL/min. Each sample with a mass of 5-10 mg was used for the measurement. The typical procedures for the measurements of P $\gamma$ BL samples were as follows: in the first heating scan, samples were heated from -85 °C to 100 °C at a heating rate of 10 °C/min and kept at 100 °C for 2 min to eliminate any thermal history. In the second heating scan, samples were cooled to -85 °C at 10 °C/min and then equilibrium at -85 °C for 2 min, and subsequently reheated to 100 °C at 10°C/min. Thermogravimetric analysis (TGA) measurements were performed on a TA Q50 thermogravimetric analyzer. The samples were heated from 40 °C to 500 °C at a heating rate of 10 °C/min under N<sub>2</sub> atmosphere with a flow rate of 50 mL/min. The mechanical tensile tests were performed on a Zwick Z005 tensile testing machine. Rectangular shaped specimens with dimensions of 75 mm length \* 4 mm width \* 0.6 mm thickness were prepared by hot press molding at 80 °C for 20 min and then cold press at room temperature for 10 min. The specimens were measured at room temperature using a crosshead speed of 20 mm/min. Young's moduli were calculated as the slope of stress-strain curves at strain below 1%. The stress at yield, elongation and stress at break and Young's moduli were reported as average values with standard deviations obtained from at least 5 specimens.

Table S1. Thermal properties of P $\gamma$ BL samples with varied molecular weights <sup>a</sup>

| sample | Mn<br>(kDa) | DSC                    |                       |                        |                           |                            |                           |                            |       | TGA                        |                             |
|--------|-------------|------------------------|-----------------------|------------------------|---------------------------|----------------------------|---------------------------|----------------------------|-------|----------------------------|-----------------------------|
|        |             | Cooling scan           |                       |                        | Second heating scan       |                            |                           |                            |       | T <sub>d, 5%</sub><br>(°C) | T <sub>d, max</sub><br>(°C) |
|        |             | T <sub>c</sub><br>(°C) | $\Delta H_c$<br>(J/g) | T <sub>g</sub><br>(°C) | T <sub>m, 1</sub><br>(°C) | $\Delta H_{m, 1}$<br>(J/g) | T <sub>m, 2</sub><br>(°C) | $\Delta H_{m, 2}$<br>(J/g) |       |                            |                             |
| S1     | 4.8         | 21.6                   | 56.1                  | -47.1                  | 43.5                      | 10.3                       | 60.2                      | 71.1                       | 219.7 | 311.2                      |                             |
| S2     | 12.1        | 14.6                   | 53.4                  | -45.6                  | 46.9                      | 5.7                        | 61.7                      | 64.6                       | 267.4 | 328.6                      |                             |

|    |      |     |      |       |      |     |      |      |       |       |
|----|------|-----|------|-------|------|-----|------|------|-------|-------|
| S3 | 16.3 | 5.3 | 49.6 | -44.1 | 46.3 | 2.7 | 61.6 | 56.8 | 292.6 | 361.0 |
| S4 | 23.3 | 6.1 | 48.2 | -44.7 | 47.0 | 1.9 | 61.9 | 53.0 | 294.6 | 378.9 |

<sup>a</sup> The conditions for the preparation of samples: S1: Table 1, run 6; S2: Table 1, run 8; S3: Table 1, run 12; S4: Table 1, run 20.

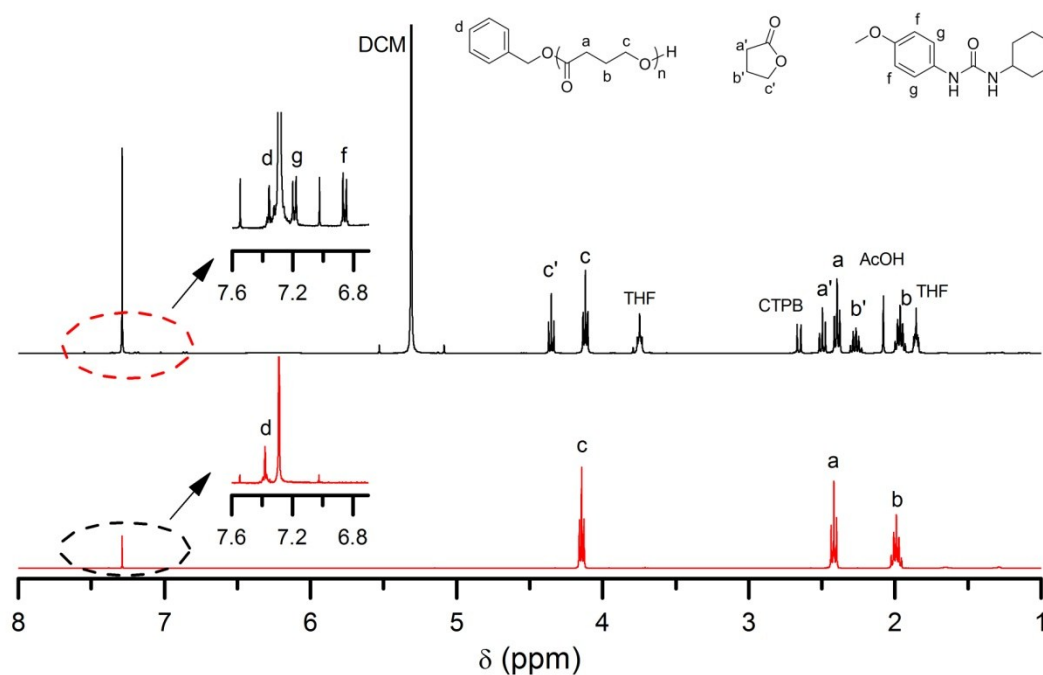

**Figure S1.** Stacked <sup>1</sup>H NMR spectra of reaction mixtures before precipitation (top) and obtained P<sub>γ</sub>BL after precipitation (bottom) in CDCl<sub>3</sub> (Table 1, run 12).

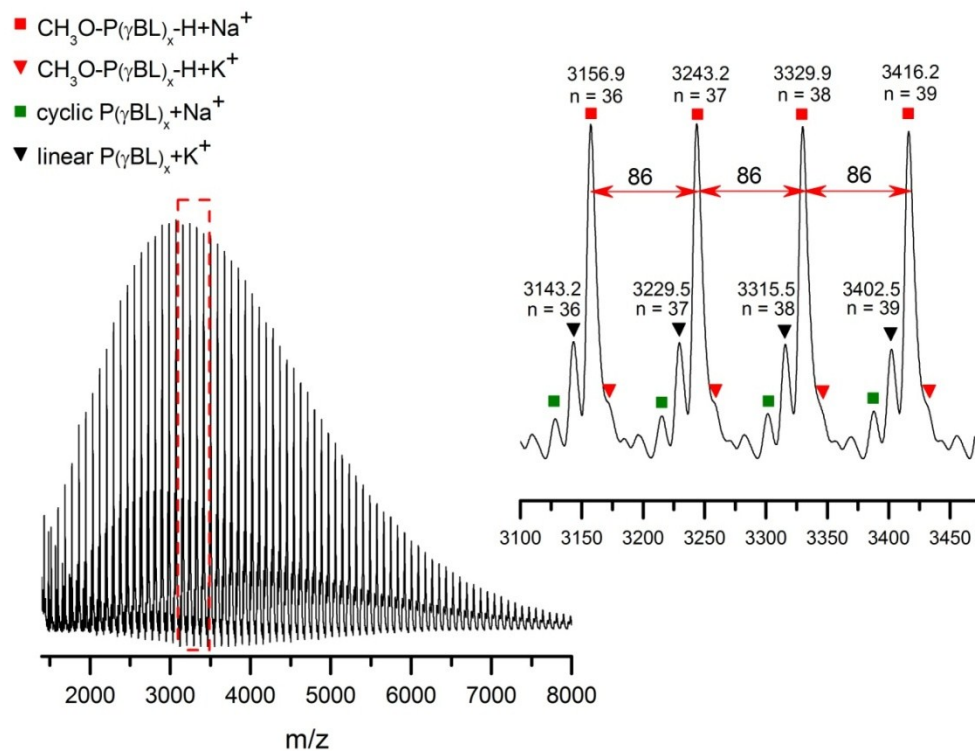

**Figure S2.** MALDI-TOF mass spectrum of P $\gamma$ BL catalyzed with KOMe alone (Table 1, run 1). ■ and ▼: linear P $\gamma$ BL with CH<sub>3</sub>O/H chain ends, ■: cyclic P $\gamma$ BL with no chain ends, ▼: linear P $\gamma$ BL with acylated lactone/H chain ends.

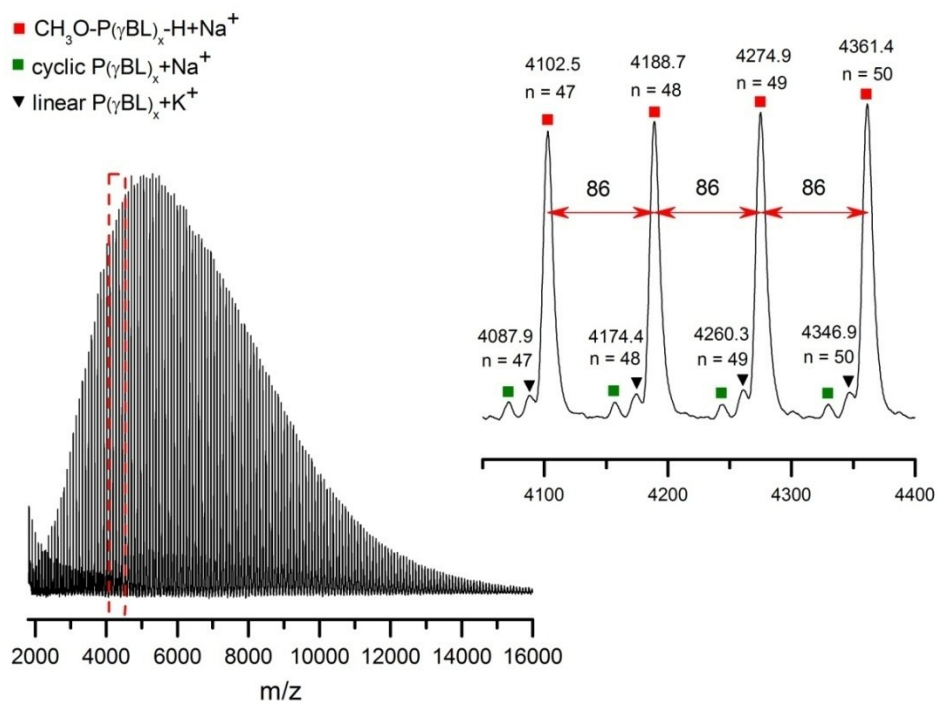

**Figure S3.** MALDI-TOF mass spectrum of P $\gamma$ BL catalyzed with KOMe/U7 (Table 1, run 8). ■: linear P $\gamma$ BL with CH<sub>3</sub>O/H chain ends, ■: cyclic P $\gamma$ BL with no chain ends, ▼: linear P $\gamma$ BL with acylated lactone/H chain ends.

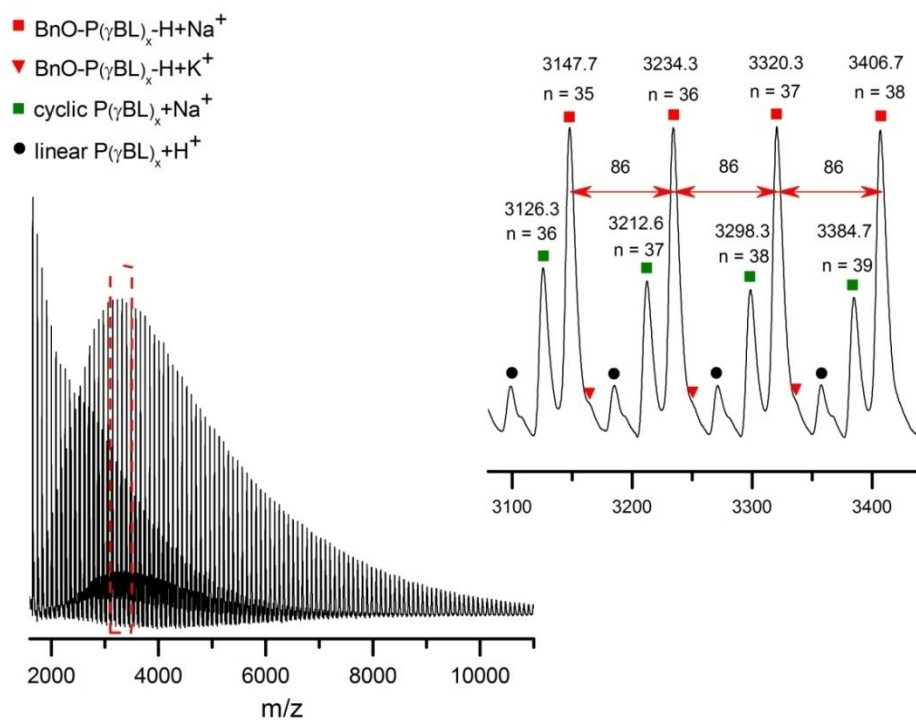

**Figure S4.** MALDI-TOF mass spectrum of P $\gamma$ BL catalyzed with CTPB alone (Table 1, run 11). ■ and ▼: linear P $\gamma$ BL with BnO/H chain ends, ■: cyclic P $\gamma$ BL with no chain ends, ●: linear P $\gamma$ BL with acylated lactone/H chain ends.

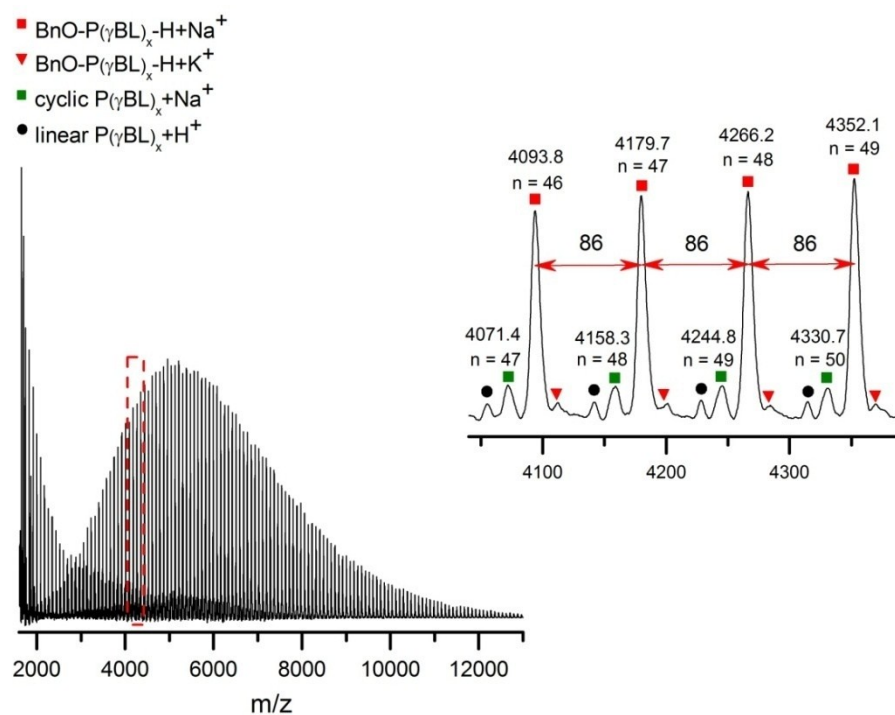

**Figure S5.** MALDI-TOF mass spectrum of P $\gamma$ BL catalyzed with  $\gamma$ BL/CTPB/U6/BnOH = 1000/1/3/1 (Table 1, run 19). ■ and ▼: linear P $\gamma$ BL with BnO/H chain ends, ■: cyclic P $\gamma$ BL with no chain ends, ●: linear P $\gamma$ BL with acylated lactone/H chain ends.

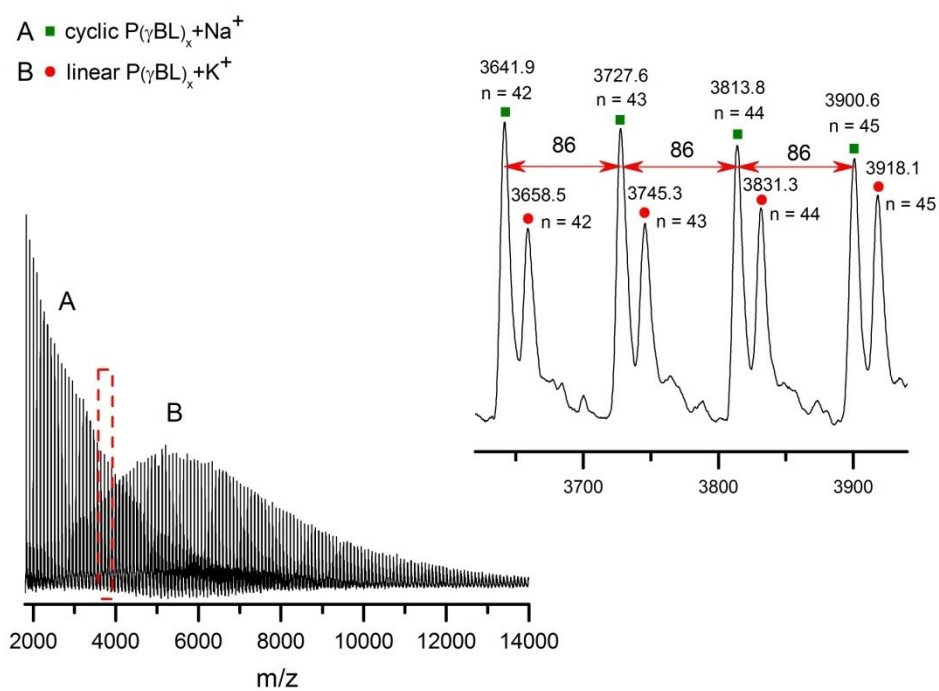

**Figure S6.** MALDI-TOF mass spectrum of P $\gamma$ BL catalyzed with  $\gamma$ BL/CTPB/U6 = 300/1/3 (Table 1, run 22). Group A ■: cyclic P $\gamma$ BL with no chain ends, group B ●: linear P $\gamma$ BL with acylated lactone/H chain ends.

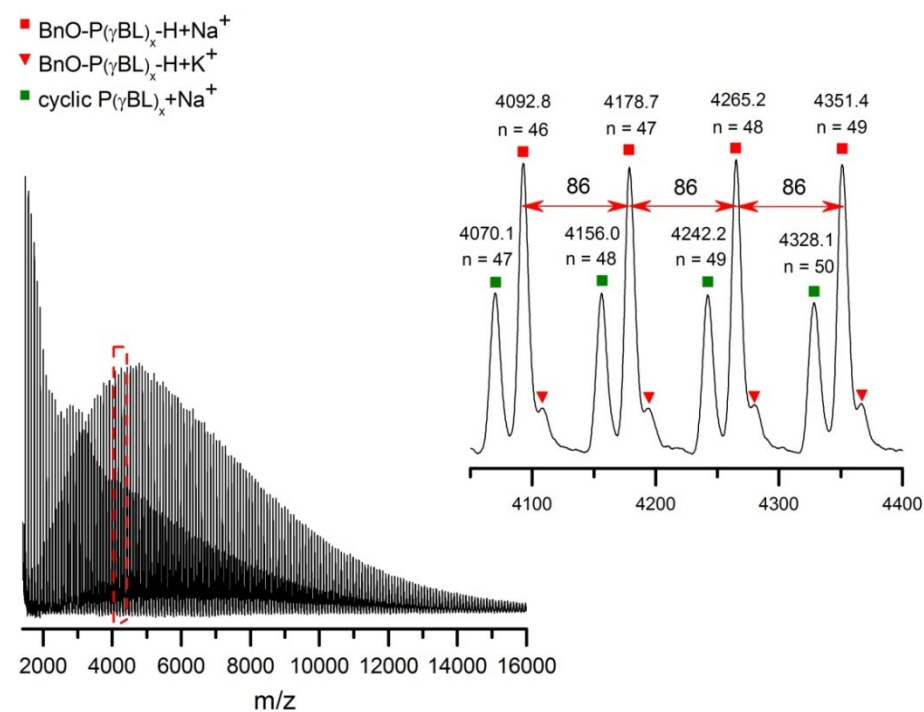

**Figure S7.** MALDI-TOF mass spectrum of P $\gamma$ BL catalyzed with  $\gamma$ BL/CTPB/U6/BnOH = 300/1/3/1 (Table 1, run 12). ■ and ▼: linear P $\gamma$ BL with BnO/H chain ends, ■: cyclic P $\gamma$ BL with no chain ends.

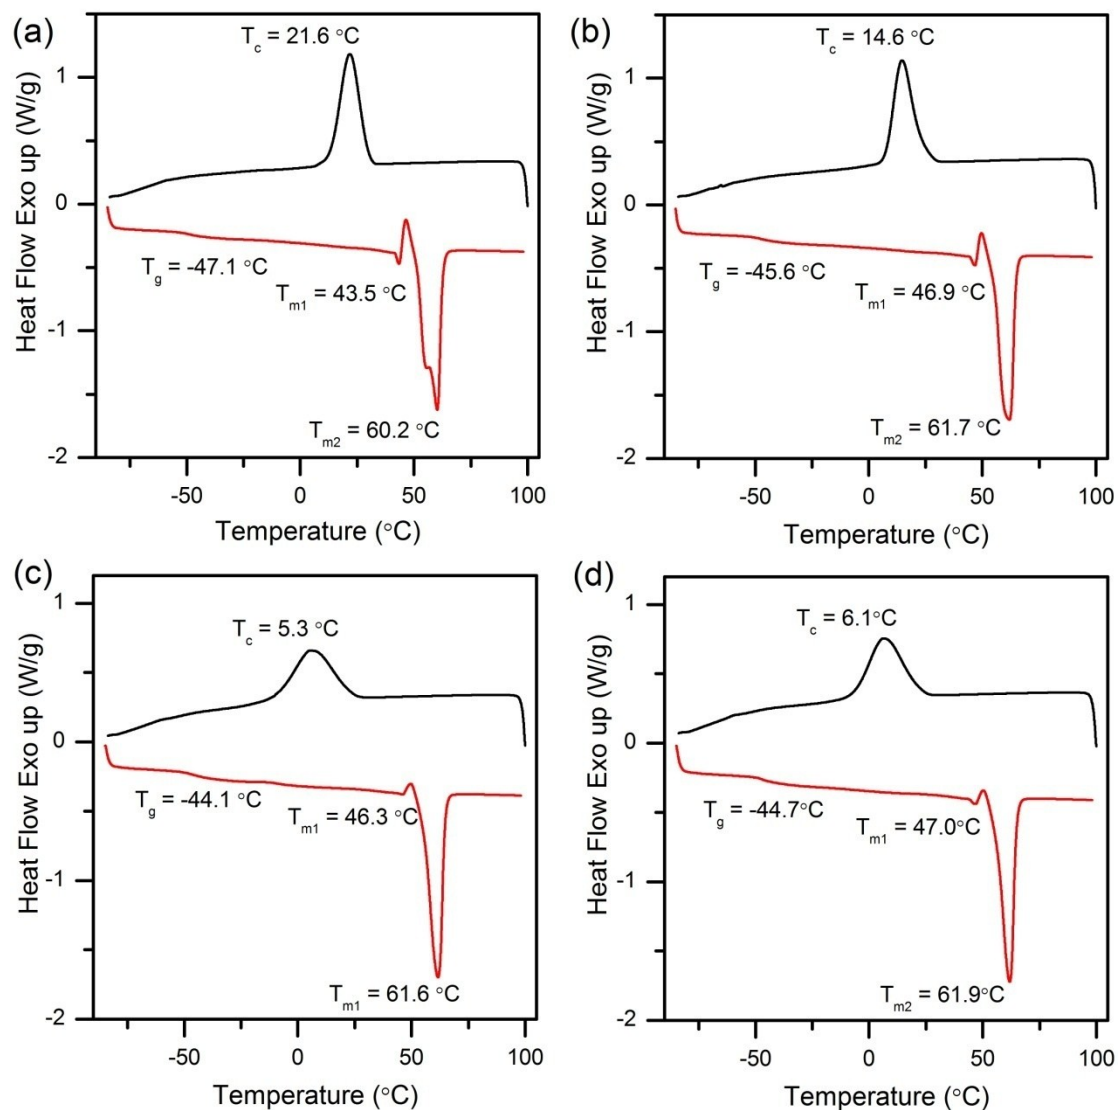

**Figure S8.** DSC curves of P $\gamma$ BL with varied molecular weights: (a) S1: 4.8 kDa,  $\bar{D}$ =1.29, Table 1, run 6; (b) S2: 12.1 kDa,  $\bar{D}$ =1.59, Table 1, run 8; (c) S3: 16.3 kDa,  $\bar{D}$ =1.80, Table 1, run 12; (d) S4: 23.3 kDa,  $\bar{D}$ =1.75, Table 1, run 20. Black line: cooling scans, red lines: second heating scans.



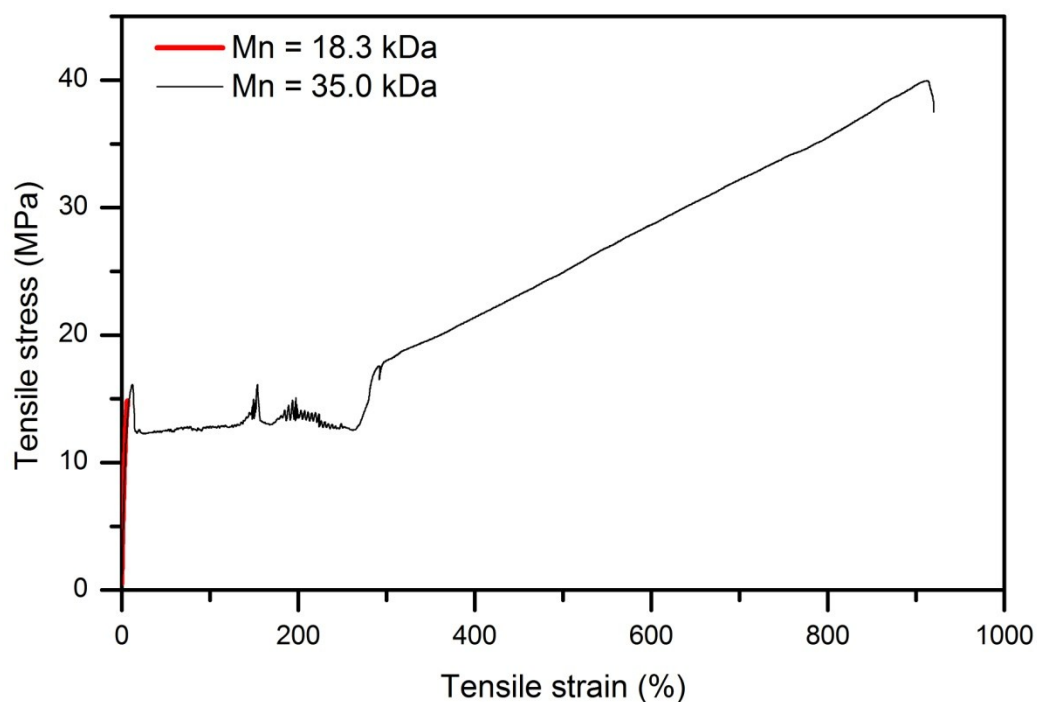

**Figure S9.** Stress-strain curve of P $\gamma$ BL with a  $M_n$  of 18.5 kDa (red line) and a  $M_n$  of 35.0 kDa (black line), respectively.

## References

- (1) Zhao, N.; Ren, C.; Li, H.; Li, Y.; Liu, S.; Li, Z. Selective Ring-Opening Polymerization of Non-Strained  $\gamma$ -Butyrolactone Catalyzed by A Cyclic Trimeric Phosphazene Base. *Angew. Chem. Int. Ed.* **2017**, *56*, 12987-12990.
- (2) Casula, A.; Fornasier, M.; Montis, R.; Bettoschi, A.; Argent, S. P.; Blake, A. J.; Lippolis, V.; Marongiu, L.; Picci, G.; Tidey, J. P.; Caltagirone, C. Halogen-substituted ureas for anion binding: solid state and solution studies. *Supramol. Chem.* **2017**, *29*, 875-886.
- (3) Dharmaratne, N. U.; Pothupitiya, J. U.; Bannin, T. J.; Kazakov, O. I.; Kiesewetter, M. K. Triclocarban: Commercial Antibacterial and Highly Effective H-Bond Donating Catalyst for Ring-Opening Polymerization. *ACS Macro Lett.* **2017**, *6*, 421-425.
- (4) Kulkarni, A. R.; Garai, S.; Thakur, G. A. Scalable, One-Pot, Microwave-Accelerated Tandem Synthesis of Unsymmetrical Urea Derivatives. *J. Org. Chem.* **2017**, *82*, 992-999.
- (5) Rakesh, K. P.; Darshini, N.; Vidhya, S. L.; Rajesha; Mallesha, N. Synthesis and SAR studies of potent H<sup>+</sup>/K<sup>+</sup>-ATPase and anti-inflammatory activities of symmetrical and unsymmetrical urea analogues. *Med. Chem. Res.* **2017**, *26*, 1675-1681.
- (6) McElroy, N. R.; Jurs, P. C.; Morisseau, C.; Hammock, B. D. QSAR and classification of murine and human soluble epoxide hydrolase inhibition by urea-like compounds. *J. Med. Chem.* **2003**, *46*, 1066-1080.
- (7) Phoon, C. W.; Sim, M. M. Traceless synthesis of urea, semicarbazide and carbamate derivatives using bromo-Wang resin and bromo-Wang SynPhase (TM) Lantern. *Synlett* **2001**, 697-699.
- (8) Lin, B.; Waymouth, R. M. Urea Anions: Simple, Fast, and Selective Catalysts for Ring-Opening Polymerizations. *J. Am. Chem. Soc.* **2017**, *139*, 1645-1652.
